# Supplementary material for: A multicomponent equimolar proton-conducting quadruple hexagonal perovskite-related oxide system
Source: Royal Society of Chemistry journal article supplement (doi:10.1039/d2dt02897b), 2023-01-01
Supplement: d2dt02897b1.pdf [file d2dt02897b1.pdf]

Supplementary information for

Multicomponent Equimolar Proton-Conducting Quadruple Hexagonal Perovskite-Related Oxide

Abid Ullah<sup>a,b,‡</sup>, Huaasain Basharat<sup>a,b,‡</sup>, Yong Youn<sup>c,‡</sup>, Hyung-Bin Bae<sup>d</sup>,  
Jong-Eun Hong<sup>a</sup>, Dong Woo Joh<sup>a</sup>, Seung-Bok Lee<sup>a</sup>, Rak-Hyung Song<sup>a</sup>, Tae Woo Kim<sup>a</sup>,  
Tak-Hyoung Lim<sup>\*a</sup> and Hye-Sung Kim<sup>\*a</sup>

<sup>a</sup>*High Temperature Energy Conversion Laboratory, Korea Institute of Energy Research,  
Daejeon 34129, Korea*

<sup>b</sup>*Department of Advanced Energy and System Engineering, University of Science and Technology,  
Daejeon 34129, Korea*

<sup>c</sup>*Computational Science & Engineering Laboratory, Korea Institute of Energy Research,  
Daejeon 34129, Korea*

<sup>d</sup>*KAIST Analysis Center for Research Advancement, Korea Advanced Institute of Science and  
Technology, Daejeon 34341, Korea*

\* Corresponding author:

E-mail address: [hsk@kier.re.kr](mailto:hsk@kier.re.kr) (H.-S. Kim) and [ddak@kier.re.kr](mailto:ddak@kier.re.kr) (T.-H. Lim)

‡The co-first authors Abid Ullah, Hussain Basharat and Yong Youn contributed equally to this work

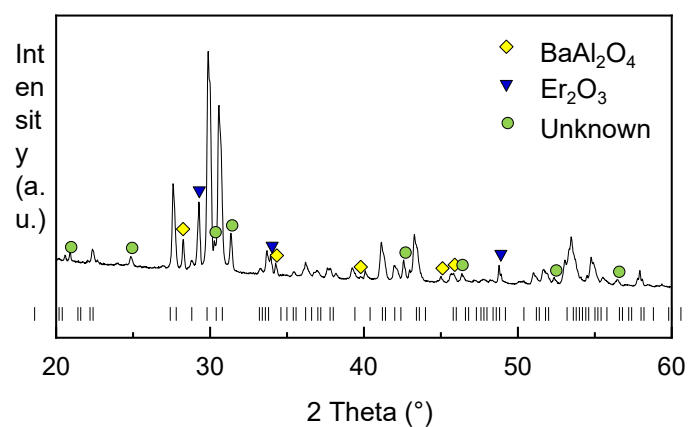

**Supplementary Figure 1.** X-ray diffraction pattern of the powder in contact with the  $\text{Al}_2\text{O}_3$  crucible used in the second heat treatment process (1600°C for 10 h) for the BRAZ synthesis. Non-negligible amounts of  $\text{BaAl}_2\text{O}_4$  (yellow diamond),  $\text{Er}_2\text{O}_3$  (blue inverted triangle), and unknown (green circle) peaks were identified along with the BRAZ main peaks. Reference XRD peaks based on the BEAZ structure are shown at the bottom of the graph for a better comparison.

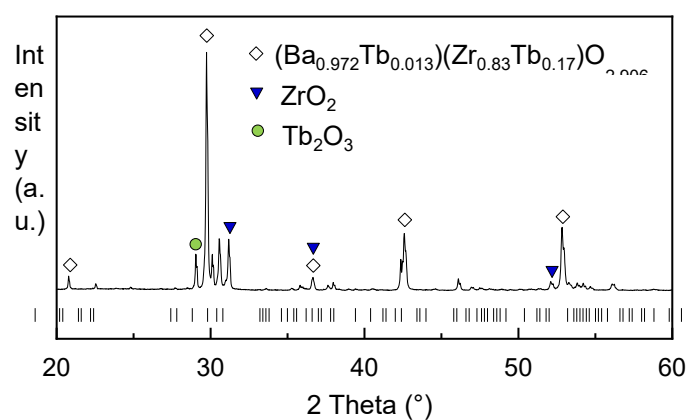

**Supplementary Figure 2.** X-ray diffraction results of the  $\text{BaTb}_2\text{Al}_2\text{ZrO}_{13}$  powder. When a divalent Tb element is added to the Re-site, the system becomes a combination of various secondary phases with  $(\text{Ba}_{0.972}\text{Tb}_{0.013})(\text{Zr}_{0.83}\text{Tb}_{0.17})\text{O}_{2.906}$  (yellow diamond),  $\text{ZrO}_2$  (blue inverted triangle),  $\text{Tb}_2\text{O}_3$  (green circle), and several unknown peaks as the main structure rather than the P63/mmc hexagonal perovskite structure. Reference XRD peaks based on the BEAZ structure are shown at the bottom of the graph for a better comparison.

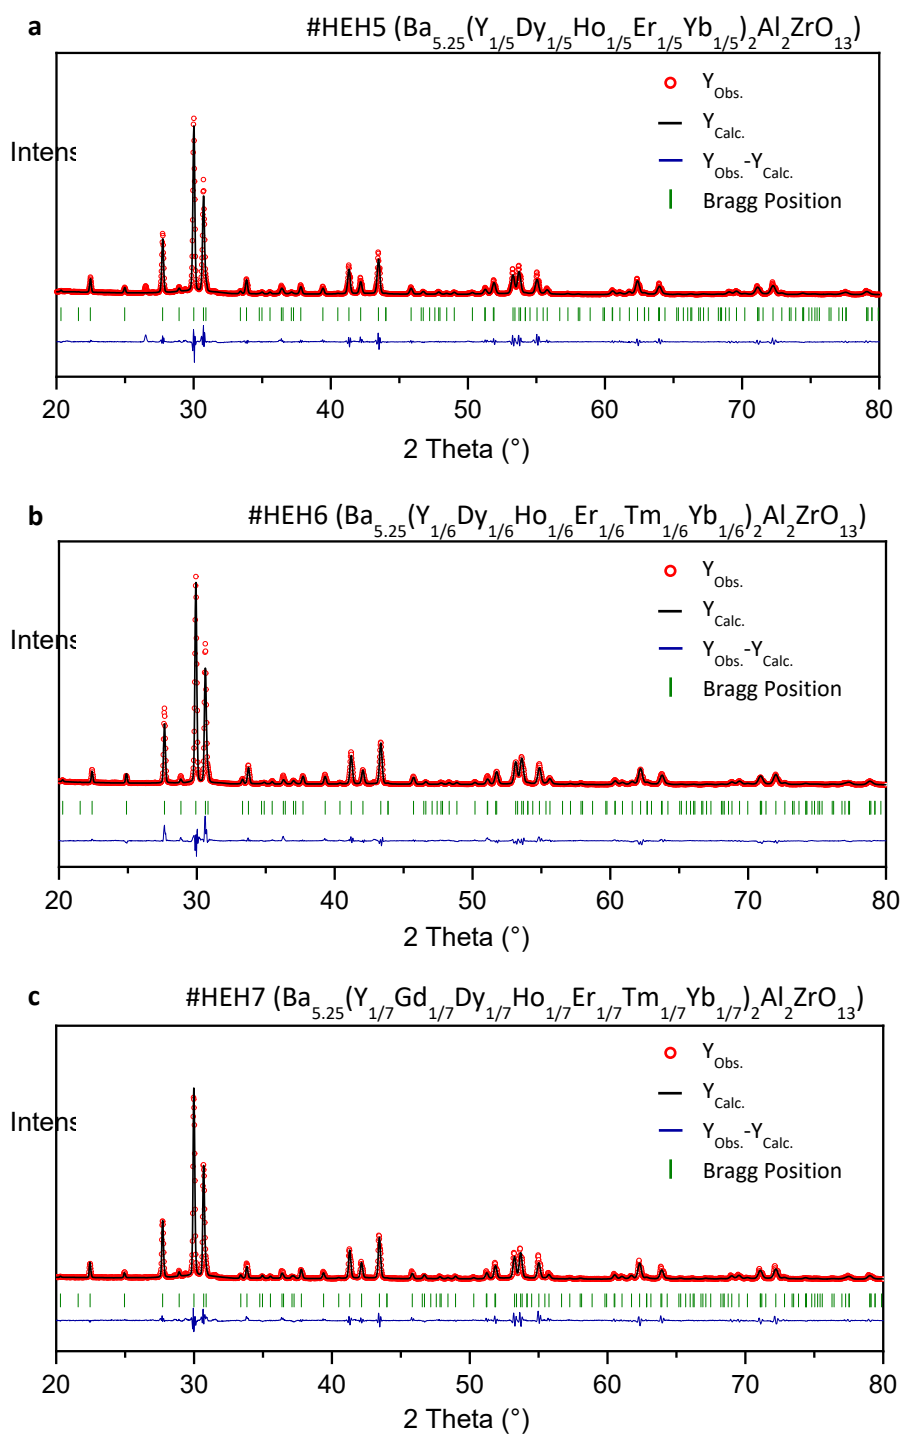

**Supplementary Figure 3.** Rietveld refinement of [\(a\) #HEH5](#), [\(b\) #HEH6](#) and [\(c\) #HEH7](#) powder. The calculated and observed patterns are shown in the top by solid black line ( $Y_{\text{Calc.}}$ ) and red dots ( $Y_{\text{Obs.}}$ ), respectively. Thick vertical below the patterns represent the

position of all possible Bragg reflections. The trace in the bottom is a plot of the difference between the observed and calculated intensities ( $Y_{\text{Obs.}} - Y_{\text{Calc.}}$ ).

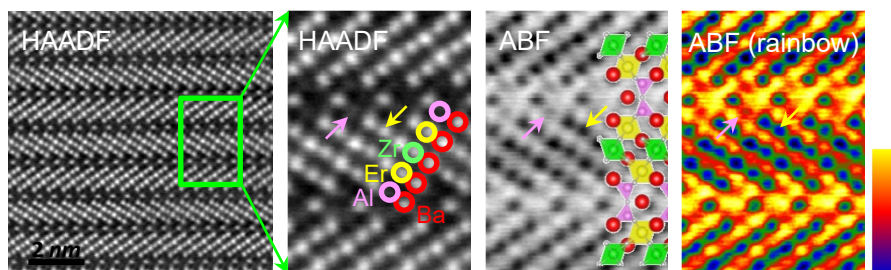

**Supplementary Figure 4.** HAADF-, ABF- and rainbow scale ABF-STEM images of  $\text{Ba}_{5.25}\text{Er}_2\text{Al}_2\text{ZrO}_{13}$  in the [100] hexagonal direction. The white arrow in HAADF-STEM magnified in the green dotted box area indicates the position of Ba in the h:BaO layer, and the pink arrow indicates the Al position, and the yellow arrow indicates the position of Er in the c:BaO layer. The position of each element was overlaid on the magnified HAADF-STEM image, and the crystal structure was overlaid on the right side of the ABF-STEM image.

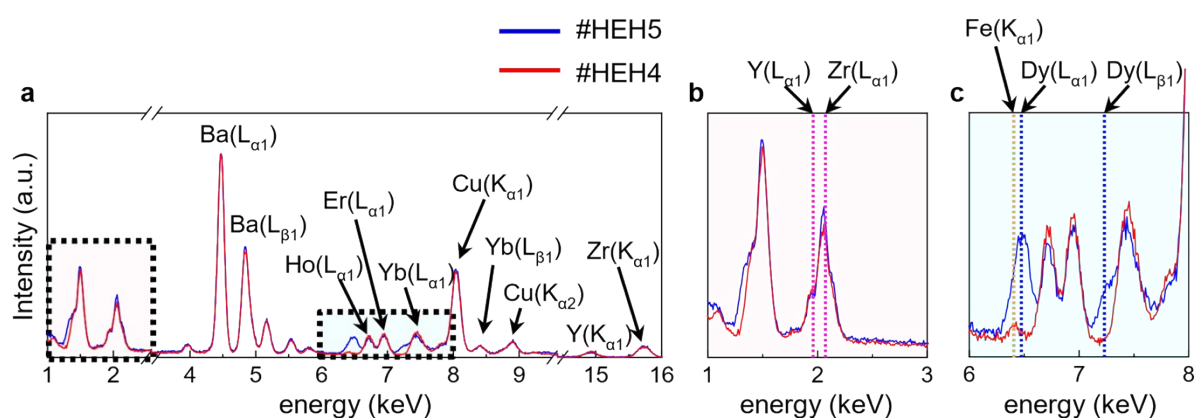

**Supplementary Figure 5.** (a) Energy-dispersive X-ray spectroscopy spectrum of #HEH5 (blue solid line) and #HEH4 (red solid line). The two spectrums were normalized based on their intensity of the  $\text{BaL}_{\alpha 1}$  peaks and were plotted with arbitrary units. (b) Magnified EDS spectrum from 1 to 3 keV presents the indistinguishable X-ray energy of the  $\text{Y-L}_{\alpha 1}$  (1.924 keV) and  $\text{Zr-L}_{\alpha 1}$  (2.044 keV) peaks and those two peaks are indicated by a pink dotted line. (c) The presence of Dy in #HEH5 was clearly confirmed through a magnified EDS spectrum from 6 to 8 keV. The intensity of  $\text{Cu-K}_{\alpha 1}$  in (a) and  $\text{Fe-K}_{\alpha 1}$  in (c) are the artifacts caused by the sample grid and TEM devices.

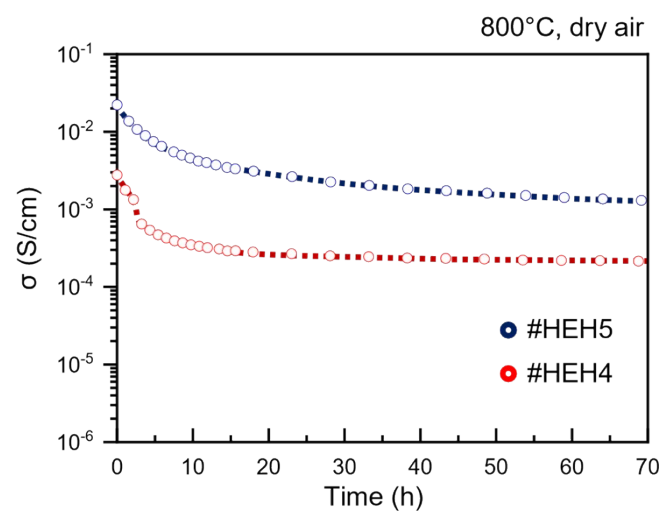

**Supplementary Figure 6.** Electrical conductivity over time in dry air at 800°C.

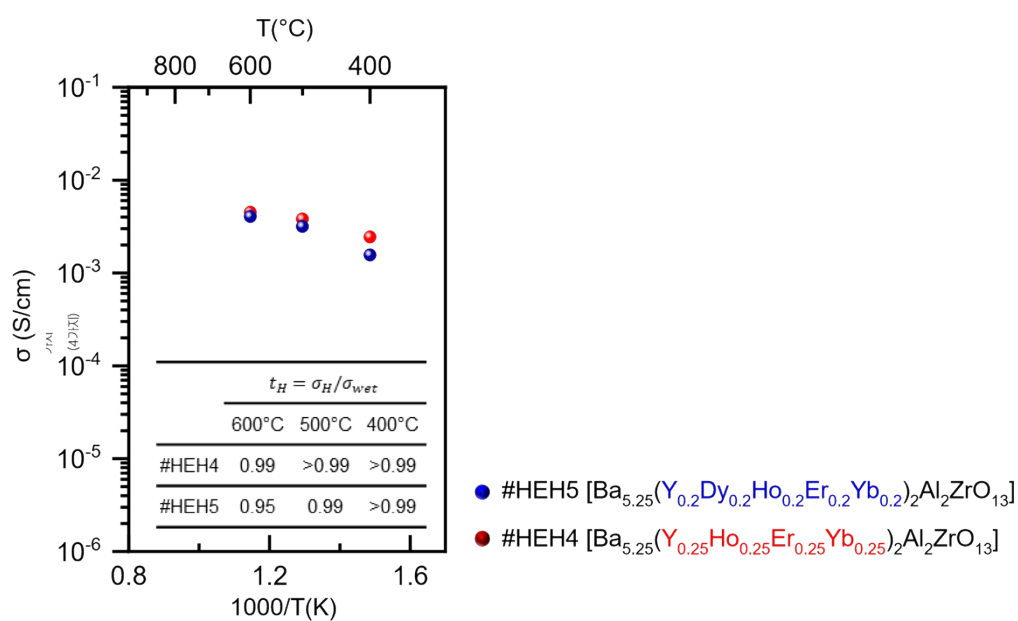

**Supplementary Figure 7.** Arrhenius plot for the pure protonic conductivity ( $t_H$ ) of #HEH5 and #HEH4.

Inside the graph, the protonic transference number values at 600°C, 500°C, and 400°C for the two systems are presented. Both systems show pure ionic conductor properties at below 500°C.

**Supplementary Table 1.** Characteristic X-ray energies of the various elements.

| Z  | Element | X-ray energy (keV) |             |              |             |              |             |
|----|---------|--------------------|-------------|--------------|-------------|--------------|-------------|
|    |         | K $\alpha$ 1       | K $\beta$ 1 | L $\alpha$ 1 | L $\beta$ 1 | M $\alpha$ 1 | M $\beta$ 1 |
| 13 | Al      | 1.486              | 1.557       |              |             |              |             |
| 26 | Fe      | 6.405              | 7.059       | 0.705        | 0.718       |              |             |
| 29 | Cu      | 8.046              | 8.904       | 0.928        | 0.947       |              |             |
| 39 | Y       | 14.958             | 16.739      | 1.924        | 1.998       |              |             |
| 40 | Zr      | 15.775             | 17.668      | 2.044        | 2.126       |              |             |
| 56 | Ba      | 32.194             | 36.378      | 4.466        | 4.828       |              |             |
| 60 | Nd      | 37.361             | 42.272      | 5.228        | 5.719       |              |             |
| 62 | Sm      | 40.118             | 45.414      | 5.633        | 6.201       |              |             |
| 63 | Eu      | 41.542             | 47.038      | 5.849        | 6.458       |              |             |
| 64 | Gd      | 42.996             | 48.695      | 6.053        | 6.708       |              |             |
| 66 | Dy      | 45.999             | 52.113      | 6.498        | 7.248       | 1.293        | 1.325       |
| 67 | Ho      | 47.547             | 53.877      | 6.720        | 7.526       | 1.348        | 1.383       |
| 68 | Er      | 49.128             | 55.674      | 6.949        | 7.811       | 1.404        | 1.448       |
| 69 | Tm      | 50.742             | 57.505      | 7.180        | 8.102       | 1.462        | 1.503       |
| 70 | Yb      | 52.388             | 59.382      | 7.416        | 8.402       | 1.526        | 1.573       |
